# Supplementary material
Source: PubMed Central journal article supplement (PMC3153949)

## Supplementary Appendix

This appendix has been provided by the authors to give readers additional information about their work.

Supplement to: Polak JF, Pencina MJ, Pencina KM, O'Donnell CJ, Wolf PA, D'Agostino RB Sr. Carotid-wall intima-media thickness and cardiovascular events. *N Engl J Med* 2011;365:213-21.

## Supplementary Appendix

This appendix has been provided by the authors to give readers additional information about their work.

Supplement to: JF Polak, MJ Pencina, KM Pencina, CJ O'Donnell, PA Wolf, RB D'Agostino Sr. Carotid wall intima-media thickness (IMT), plaque and cardiovascular events.

Supplementary Appendix for Polak et al: Carotid intima-media wall thickness (IMT), plaque and cardiovascular events.

- I. Breakdown of cardiovascular events
- II. Re-classification Tables for CCA IMT and ICA IMT
- III. Ultrasound images showing the location of IMT measurements.
- IV. Kaplan-Meier curves for common and internal carotid artery intima-media thickness (IMT) by quartiles

Supplemental Table 1:

Types of cardiovascular events and associated hazard ratios for internal carotid artery (ICA) intima-media thickness (IMT).

| Type of event               | Number | Percent | Hazards ratio and 95% Confidence Limits | p-value  |
|-----------------------------|--------|---------|-----------------------------------------|----------|
| Coronary Heart Disease      | 152    | 51.2    | 1.15 (0.98, 1.34)                       | 0.08     |
| Stroke                      | 74     | 24.9    | 1.35 (1.19, 1.53)                       | < 0.0001 |
| Peripheral Arterial Disease | 26     | 8.8     | 1.42 (1.16, 1.73)                       | 0.0006   |
| Congestive Heart Failure    | 45     | 15.1    | 1.22 (0.99, 1.49)                       | 0.056    |

Supplemental Table 2

Reclassification into new Framingham Risk Score categories as a function of original Framingham Risk Score categories for common carotid Artery Intima-Media Thickness.

| Non-Events                    | New low risk | New moderate risk | New high risk |
|-------------------------------|--------------|-------------------|---------------|
| Low risk<br>( $< 6\%$ )       | 1151         | 36                | 0             |
| Moderate risk<br>( $6-20\%$ ) | 45           | 1185              | 25            |
| High risk<br>( $> 20\%$ )     | 0            | 26                | 239           |

| Events                        | New low risk | New moderate risk | New high risk |
|-------------------------------|--------------|-------------------|---------------|
| Low risk<br>( $< 6\%$ )       | 33           | 3                 | 0             |
| Moderate risk<br>( $6-20\%$ ) | 0            | 120               | 4             |
| High risk<br>( $> 20\%$ )     | 0            | 8                 | 90            |

Reclassification for non-events:  $- 0.4\%$  (10 cases / 2707)

Reclassification for events:  $- 0.4\%$  (-1 / 258)

Net Reclassification Index:  $-0.4\% - (-0.4\%) = 0\%$

IMT (Intima-Media Thickness) is used as a continuous variable.

Supplemental Table 3

Reclassification into new Framingham Risk Score categories as a function of original Framingham Risk Score categories using Internal carotid Artery Intima-Media Thickness >1.5 mm as a cut-point for plaque.

| Non-Events               | New low risk | New moderate risk | New high risk |
|--------------------------|--------------|-------------------|---------------|
| Low risk<br>(< 6%)       | 1078         | 78                | 0             |
| Moderate risk<br>(6-20%) | 199          | 948               | 109           |
| High risk<br>(> 20%)     | 0            | 72                | 202           |

| Events                   | New low risk | New moderate risk | New high risk |
|--------------------------|--------------|-------------------|---------------|
| Low risk<br>(< 6%)       | 22           | 13                | 0             |
| Moderate risk<br>(6-20%) | 6            | 101               | 19            |
| High risk<br>(> 20%)     | 0            | 15                | 84            |

Reclassification for non-events: - 3.1% (84 / 2686)

Reclassification for events: 4.2% (11 / 260)

Net Reclassification Index: 4.2% - (-3.1%) = 7.3%

### Section III

#### Figure 1

Typical location of carotid artery intima-media thickness measurements is defined by the rectangle. This location is below the distal common carotid artery bifurcation where the wall thickness progressively and can readily reach IMT values consistent with plaques (arrows). Inclusion of measurements made near the bifurcation (arrows) biases the intima-media thickness measurement towards values representing early plaque formation in a subset of the population.

#### Figure 2

Typical location of internal carotid artery intima-media thickness measurement at the location of a plaque (arrow). The maximum intima-media thickness at this location corresponds to plaque thickness and this definition of plaque is consistent with measurements made on intravascular ultrasound images. Specifically, pathologically defined plaque included only the intima while ultrasound defined plaque includes both the intima and the media.

Figure 1

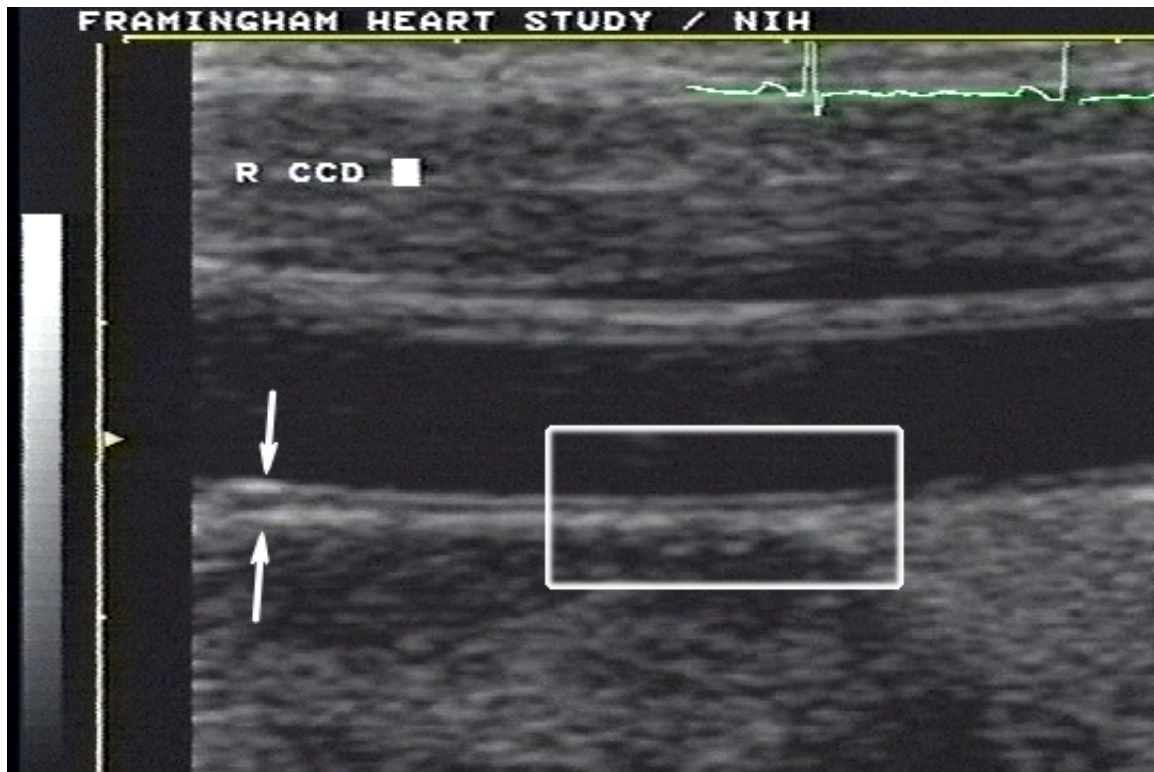



Figure 2

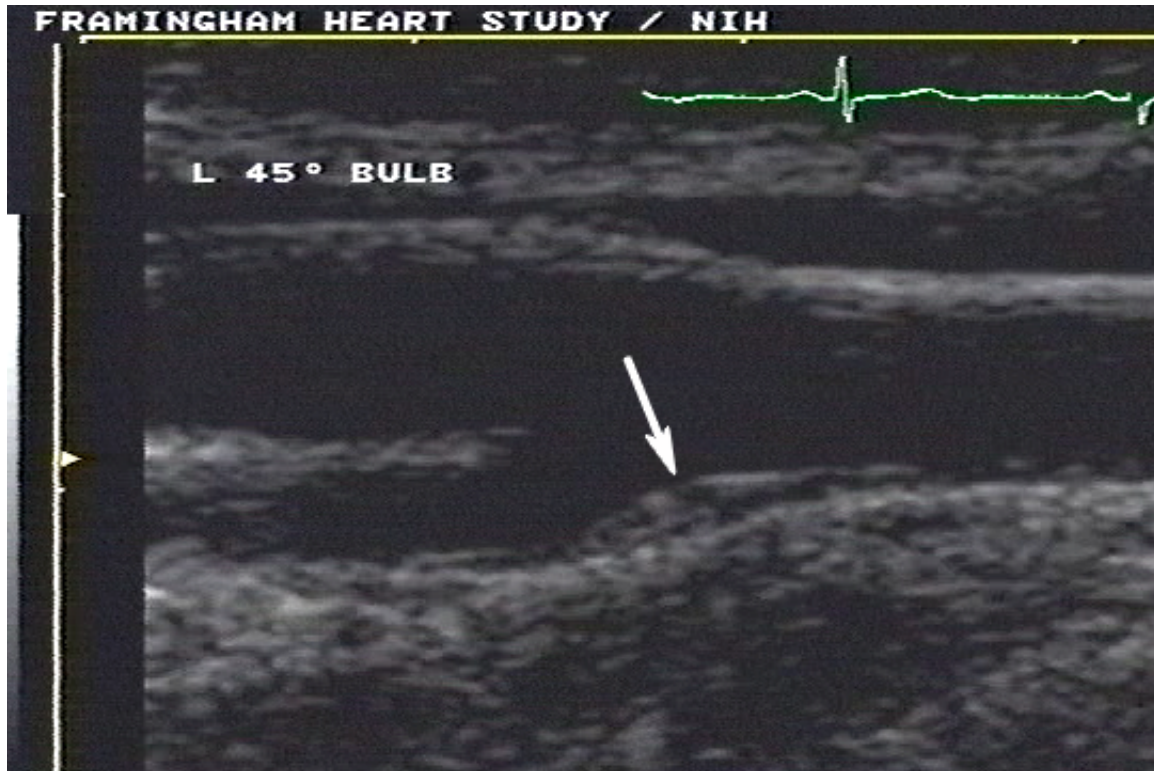

## Section IV

Figure 3:

Kaplan-Meier curves for mean common carotid artery intima-media thickness presented as quartiles and for time to incident cardiovascular event as outcome.

Figure 4:

Kaplan-Meier curves for maximum internal carotid artery intima-media thickness presented as quartiles and for time to incident cardiovascular event as outcome.

Figure 3

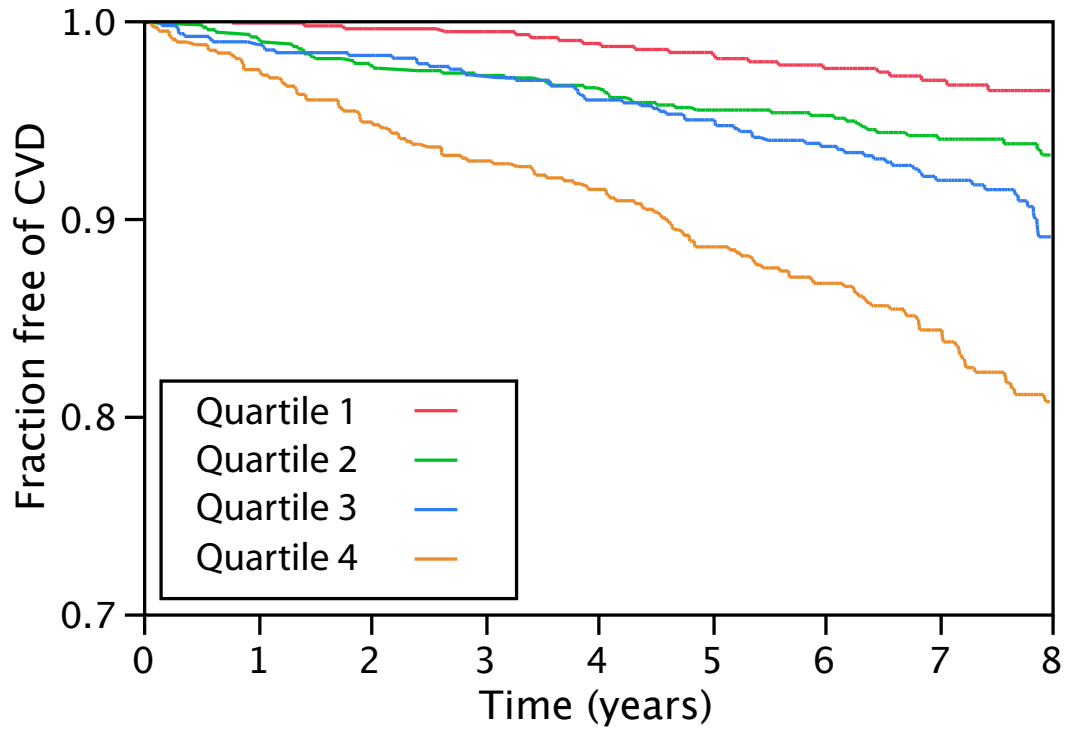

Figure 4

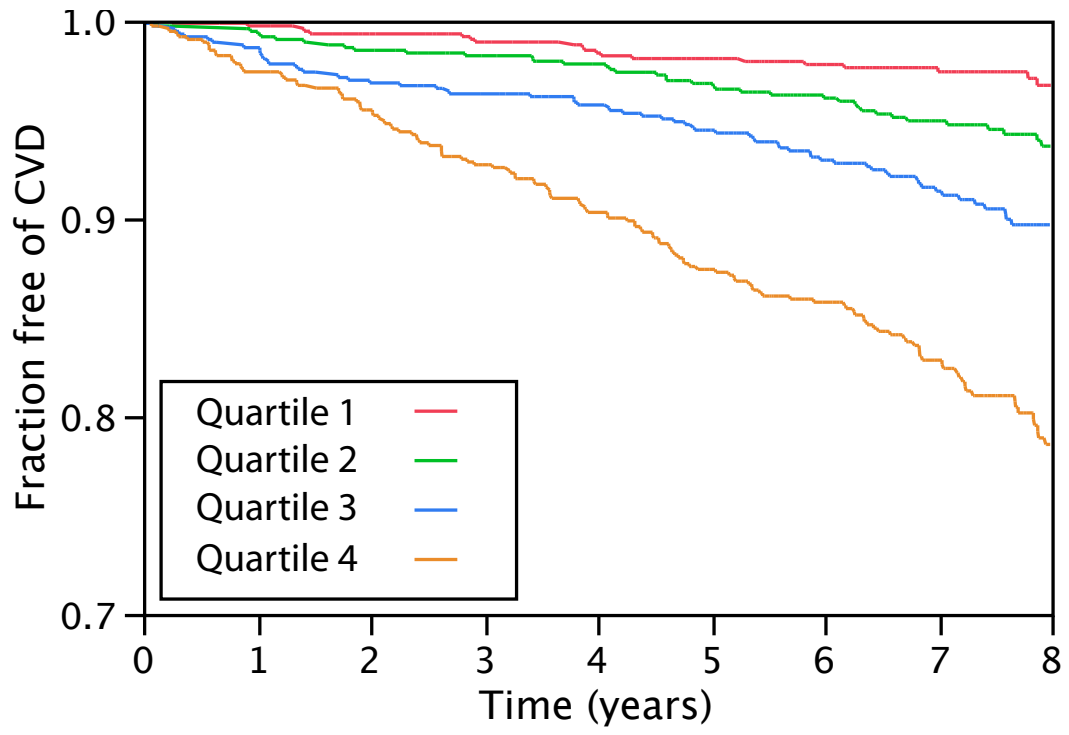

Supplement: NIHMS313472-supplement-Supplement1.pdf [file NIHMS313472-supplement-Supplement1.pdf]
